# Supplementary material for: Lactic acid bacteria exhibit similar antioxidant capacities inCaenorhabditis elegans- andCampylobacter jejuni-infected mice
Source: Royal Society of Chemistry journal article supplement (doi:10.1039/c9ra06105c), 2020-01-01
Supplement: c9ra06105c1.pdf [file c9ra06105c1.pdf]

## Supplementary Material

### 1 Supplementary Figures and Tables

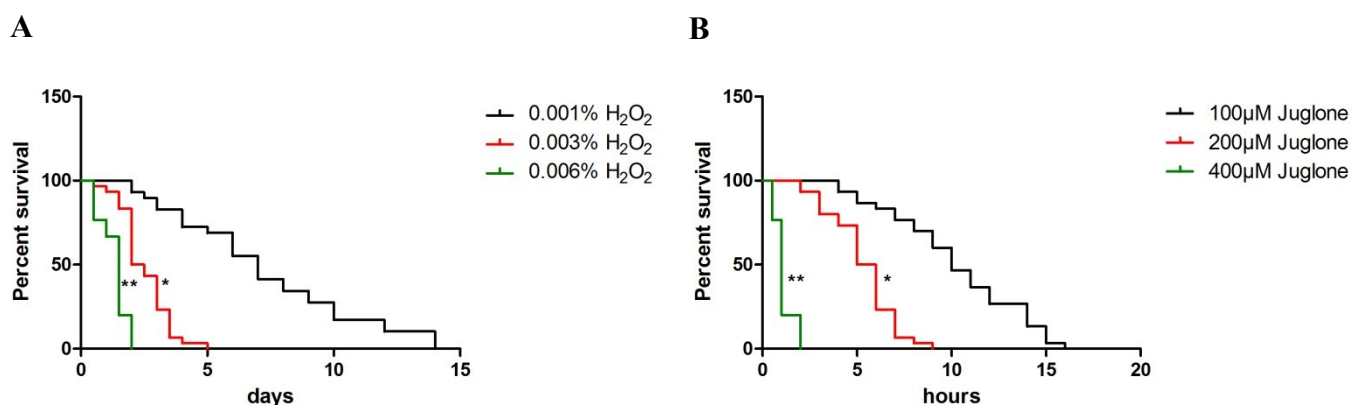

**Fig. S1** The differential survival of *C. elegans* under different levels of oxidative stress. (A) The survival of *C. elegans* under 0.001% (v/v)  $\text{H}_2\text{O}_2$ , 0.003% (v/v)  $\text{H}_2\text{O}_2$  and 0.006% (v/v)  $\text{H}_2\text{O}_2$  respectively. (B) The survival of *C. elegans* under 100  $\mu\text{M}$  juglone, 200  $\mu\text{M}$  juglone and 400  $\mu\text{M}$  juglone respectively. \* Indicates statistically significant differences at  $p < 0.01$ .

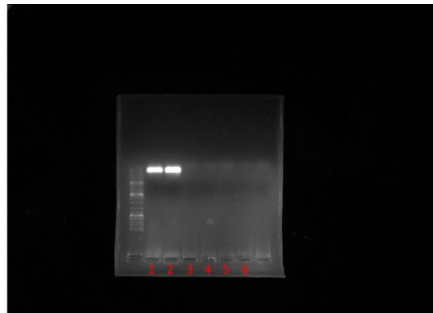

*pmk-1*

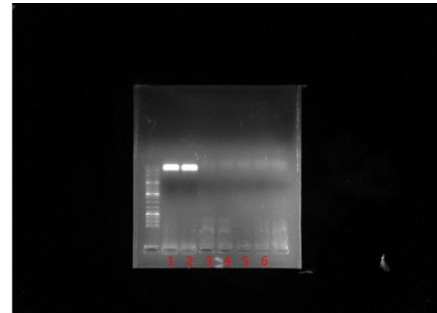

*skn-1*

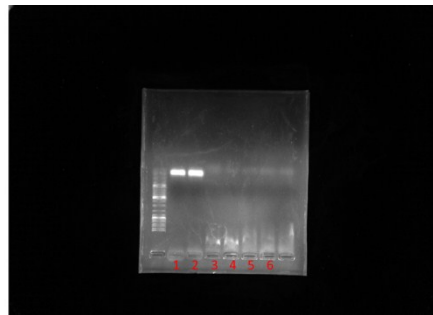

*sek-1*

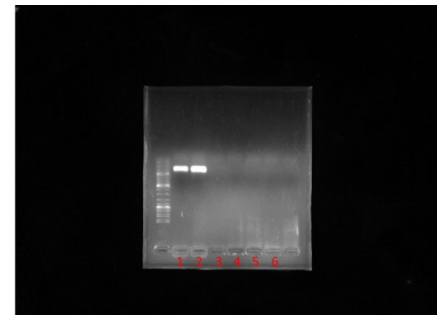

*sod-3*

**Fig. S2** The validation of primers about antioxidant genes (*pmk-1*, *skn-1*, *sek-1* and *sod-3*) of *C. elegans*. 1. The cDNA templates come from *C. elegans* which fed 427 at a concentration of  $10^9$  CFU/mL for two days after L4 stage. 2. The cDNA templates come from *C. elegans* which fed X13 at a concentration of  $10^9$  CFU/mL for two days after L4 stage. 3. The cDNA templates come from *E. coli*. 4. The cDNA templates come from 427. 5. The cDNA templates come from X13. 6. The cDNA templates come from a mixture of *E. coli*, 427 and X13.

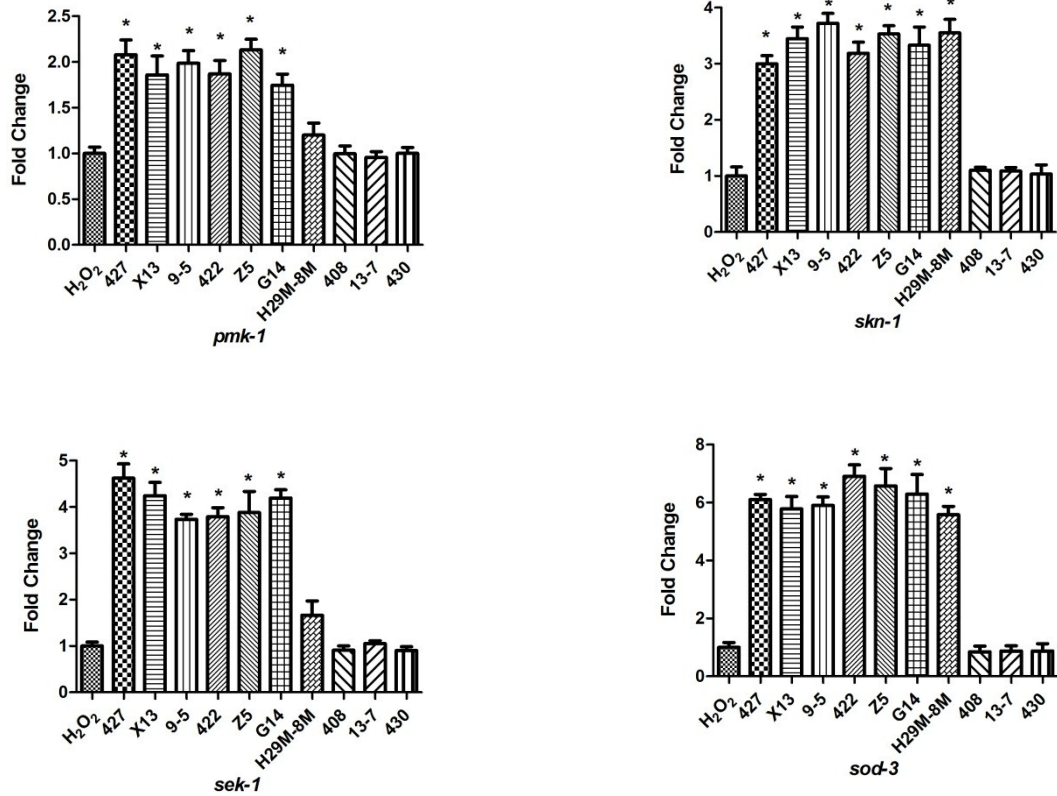

**Fig. S3** Differential effects of LAB on the transcription of antioxidant genes of *C. elegans* whose surface were washed repeatedly before exposed to H<sub>2</sub>O<sub>2</sub>. H<sub>2</sub>O<sub>2</sub>: treatment with *E. coli* OP50 in the first two days and then exposed to H<sub>2</sub>O<sub>2</sub> at the L4 stage of *C. elegans*. LAB: treatment with LAB in the first two days and then exposed to H<sub>2</sub>O<sub>2</sub> at the L4 stage of *C. elegans*. \* Indicates statistically significant differences at  $p < 0.05$ .

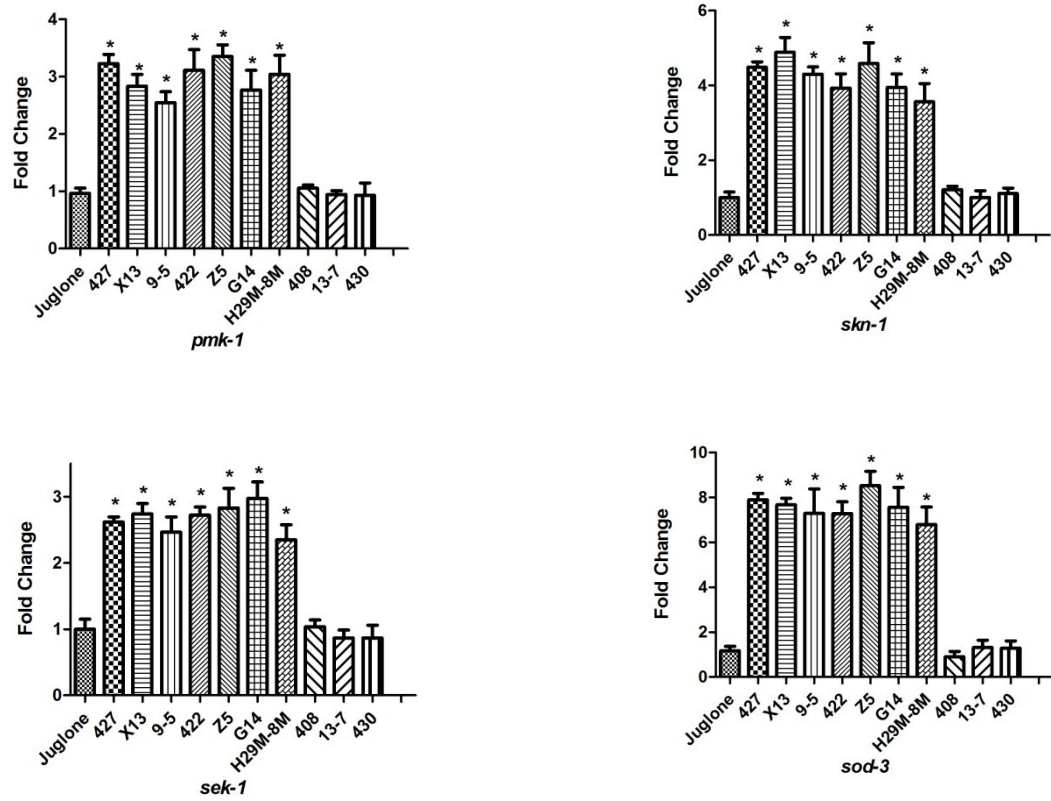

**Fig. S4** Differential effects of LAB on the transcription of antioxidant genes of *C. elegans* whose surface were washed repeatedly exposed to juglone. Juglone: treatment with *E. coli* OP50 in the first two days and then exposed to juglone at the L4 stage of *C. elegans*. LAB: treatment with LAB in the first two days and then exposed to juglone at the L4 stage of *C. elegans*. \* Indicates statistically significant differences at  $p < 0.05$ .
